# Supplementary material for: Role of Modified Diet and Gut Microbiota in Metabolic Endotoxemia in Mice
Source: Research Square preprint supplement (doi:10.21203/rs.3.rs-603542/v1), 2021-06-22
Supplement: Supplementary file 1 [file 9ba1f786f31110164221c7ee.docx]

**Table S1 Morphological characterization of fecal bacteria isolated from obese patients on**

**brain heart infusion agar.**

| **Strains** | **Shape** | **Colour** | **Texture** | **Margins** | **Elevations** | | **Opacity** | **Surface** | |
| --- | --- | --- | --- | --- | --- | --- | --- | --- | --- |
| OB-1 | Irregular | Yellow | Moist | Undulate | Raised | Opaque | | Shiny |
| OB-2 | Regular | Yellow | Dry | Entire | Raised | Opaque | | Dusky |
| OB-3 | Regular | Yellow | Moist | Entire | Raised | Opaque | | Dusky |
| OB-4 | Irregular | White | Buttery | Undulate | Flat | Transparent | | Shiny |
| OB-5 | Regular | Yellow | Moist | Entire | Raised | Opaque | | Dusky |
| OB-6 | Irregular | Yellow | Dry | Undulate | Raised | Opaque | | Dusky |
| OB-7 | Regular | Yellow | Dry | Entire | Raised | Translucent | | Dusky |
| OB-8 | Regular | Yellow | Buttery | Entire | Convex | Translucent | | Shiny |
| OB-9 | Irregular | Yellow | Buttery | Undulate | Flat | Translucent | | Shiny |
| OB-10 | Regular | Yellow | Moist | Entire | Raised | Opaque | | Shiny |
| OB-11 | Irregular | Offwhite | Buttery | Entire | Convex | Opaque | | Shiny |
| OB-12 | Regular | Offwhite | Dry | Entire | Convex | Opaque | | Shiny |
| OB-13 | Irregular | Yellow | Mucoid | Undulate | Convex | Opaque | | Dusky |
| OB-14 | Regular | Yellow | Mucoid | Entire | Flat | Translucent | | Shiny |
| OB-15 | Regular | White | Moist | Entire | Flat | Transparent | | Shiny |
| OB-16 | Regular | White | Buttery | Entire | Convex | Transparent | | Shiny |
| OB-17 | Regular | White | Mucoid | Entire | Convex | Transparent | | Shiny |

OB, Obese patients
